# Supplementary material
Source: publisher figshare collection journal article supplement (https://karger.figshare.com/ndownloader/files/28365882)
Supplement: Supplementary file 1 [file 28365882]

Table S5: Weighting of the independent prognostic parameters in the new model

|  | **coefficient** | **p-value** | **HR** | **HR 95%CI** |
| --- | --- | --- | --- | --- |
| **AFP ≥400ng/ml** | 0.867 | 0.0045 | 2.380 | 1.306-4.339 |
| **Albumin <3.6g/dl** | 1.769 | <0.0001 | 5.866 | 2.733-12.591 |
| **AP ≥116U/l** | 2.125 | <0.0001 | 8.377 | 3.212-21.846 |
